# Supplementary material
Source: publisher site journal article supplement (https://www.dovepress.com/article/489502)
Supplement: Supplementary file 1 [file get_supplementary_file.php]

**Supplementary Table 1** Inflammatory and Nutritional Indicators in Disease Typing of Patients with MS

| **Indicator** | **CIS (n=12)** | **RRMS (n=204)** | **SPMS (n=17)** | **PPMS (n=11)** | **P-value** |
| --- | --- | --- | --- | --- | --- |
| MLR | 0.22(0.12–0.32) | 0.20(0.16–0.27) | 0.19(0.17–0.24) | 0.23(0.19–0.27) | 0.899 |
| NLR | 1.91(1.47–3.65) | 2.09(1.56–3.16) | 1.94(1.57–2.46) | 2.52(1.94–3.21) | 0.823 |
| PLR | 101.22(89.44–131.98) | 132.23(105.21–163.62) | 138.63(101.63–161.49) | 163.93(124.31–185.11) | 0.198 |
| SII | 389.25(293.78–892.57) | 516.33(350.21–790.86) | 487.51(341.38–824.84) | 573.45(487.7–923.38) | 0.645 |
| SIRI | 0.74(0.43–2.09) | 0.82(0.54–1.31) | 0.68(0.59–1.01) | 0.98(0.55–1.72) | 0.868 |
| HB (g/L) | 132(123–138) | 136(125–148) | 120(113–132) | 138(134–141) | 0.002 |
| ALB (g/L) | 41.1(40.8–42.7) | 42(39.6–44.3) | 39.5(39.1–41.5) | 39.4(38.7–40.1) | 0.001 |
| BMI (kg/m2) | 22.89(20.55–23.42) | 22.07(19.88–24.77) | 22.6(21.30–25.35) | 22.41(20.47–23.23) | 0.912 |

Data are expressed as median (interquartile range); ALB, albumin; BMI, body mass index; CIS, clinically isolated syndrome; HB, hemoglobin; MLR, monocyte-to-lymphocyte ratio; MS, multiple sclerosis; NLR, neutrophil-to-lymphocyte ratio; PLR, platelet-to-lymphocyte ratio; PPMS, primary progressive multiple sclerosis; RRMS, relapsing-remitting multiple sclerosis; SII, systemic immune-inflammatory index; SIRI, systemic inflammatory response index; SPMS, secondary progressive multiple sclerosis.

**Supplementary Table 2** Inflammatory and Nutritional Indicators in Disease Typing of Patients with NMOSD

| **Indicator** | **AQP4-IgG+ (n=175)** | **AQP4-IgG- (n=74)** | **P-value** |
| --- | --- | --- | --- |
| MLR | 0.22(0.16–0.31) | 0.26(0.20–0.32) | 0.075 |
| NLR | 2.57(1.74–3.77) | 2.44(1.84–3.65) | 0.604 |
| PLR | 134.44(105.75–204.72) | 123.57(96.16–154.4) | 0.052 |
| SII | 651.12(416.6–1157.3) | 570.96(392.75–830.64) | 0.311 |
| SIRI | 1.09(0.59–1.65) | 1.09(0.71–2.01) | 0.343 |
| HB (g/L) | 127(118–137) | 132(122–147) | 0.009 |
| ALB (g/L) | 39.7(37.7–42.75) | 40.1(38.08–42.48) | 0.740 |
| BMI (kg/m2) | 22.89(20.63–25.71) | 23.53(20.98–26.00) | 0.409 |

Data are expressed as median (interquartile range); ALB, albumin; AQP4, aquaporin-4; BMI, body mass index; HB, hemoglobin; MLR, monocyte-to-lymphocyte ratio; NLR, neutrophil-to-lymphocyte ratio; NMOSD, neuromyelitis optica spectrum disorder; PLR, platelet-to-lymphocyte ratio; SII, systemic immune-inflammatory index; SIRI, systemic inflammatory response index.

**Supplementary Table 3** Correlation of Inflammatory and Nutritional Indicators with Multiple Sclerosis Disease Severity

| **Indicator** | **ESR** | | **CRP** | | **Total T lymphocytes** | |
| --- | --- | --- | --- | --- | --- | --- |
| ***r*** | **P-value** | ***r*** | **P-value** | ***r*** | **P-value** |
| MLR | 0.146 | 0.014 | 0.308 | <0.001 | -0.246 | <0.001 |
| NLR | 0.139 | 0.018 | 0.346 | <0.001 | -0.264 | <0.001 |
| PLR | 0.158 | 0.009 | 0.135 | 0.043 | -0.175 | 0.011 |
| SII | 0.117 | 0.039 | 0.196 | 0.003 | -0.214 | 0.002 |
| SIRI | 0.145 | 0.015 | 0.306 | <0.001 | -0.221 | 0.001 |
| HB | -0.161 | 0.008 | -0.085 | 0.203 | -0.058 | 0.401 |
| ALB | -0.112 | 0.046 | -0.076 | 0.254 | -0.093 | 0.180 |
| BMI | 0.130 | 0.026 | 0.036 | 0.598 | -0.076 | 0.271 |

ALB, albumin; BMI, body mass index; CRP, C-reactive protein; ESR, erythrocyte sedimentation rate; HB, hemoglobin; MLR, monocyte-to-lymphocyte ratio; NLR, neutrophil-to-lymphocyte ratio; PLR, platelet-to-lymphocyte ratio; SII, systemic immune-inflammatory index; SIRI, systemic inflammatory response index.

**Supplementary Table 4** Correlation of Inflammatory and Nutritional Indicators with Neuromyelitis Optica Spectrum Disorder Disease Severity

| **Indicator** | **ESR** | | **CRP** | | **Total T lymphocytes** | |
| --- | --- | --- | --- | --- | --- | --- |
| ***r*** | **P-value** | ***r*** | **P-value** | ***r*** | **P-value** |
| MLR | 0.133 | 0.040 | 0.273 | <0.001 | -0.198 | 0.003 |
| NLR | 0.061 | 0.345 | 0.143 | 0.029 | -0.245 | <0.001 |
| PLR | 0.223 | 0.001 | 0.152 | 0.023 | -0.210 | 0.002 |
| SII | 0.073 | 0.258 | 0.147 | 0.024 | -0.234 | <0.001 |
| SIRI | 0.047 | 0.465 | 0.202 | 0.002 | -0.249 | <0.001 |
| HB | -0.193 | 0.003 | -0.021 | 0.751 | -0.046 | 0.495 |
| ALB | -0.321 | <0.001 | -0.227 | 0.001 | -0.012 | 0.860 |
| BMI | 0.050 | 0.455 | 0.102 | 0.136 | 0.063 | 0.356 |

ALB, albumin; BMI, body mass index; CRP, C-reactive protein; ESR, erythrocyte sedimentation rate; HB, hemoglobin; MLR, monocyte-to-lymphocyte ratio; NLR, neutrophil-to-lymphocyte ratio; PLR, platelet-to-lymphocyte ratio; SII, systemic immune-inflammatory index; SIRI, systemic inflammatory response index.

**Supplementary Table 5** Correlation of Inflammatory and Nutritional Indicators with Mean Attack Frequency

| **Indicator** | **MS** | | **NMOSD** | |
| --- | --- | --- | --- | --- |
| ***r*** | **P-value** | ***r*** | **P-value** |
| MLR | 0.000 | 0.995 | 0.088 | 0.173 |
| NLR | 0.129 | 0.062 | 0.107 | 0.097 |
| PLR | -0.057 | 0.410 | -0.075 | 0.248 |
| SII | 0.124 | 0.072 | 0.107 | 0.098 |
| SIRI | 0.136 | 0.049 | 0.172 | 0.008 |
| HB | -0.008 | 0.913 | 0.049 | 0.450 |
| ALB | -0.015 | 0.833 | -0.020 | 0.757 |
| BMI | -0.032 | 0.641 | -0.013 | 0.842 |

ALB, albumin; BMI, body mass index; HB, hemoglobin; MS, multiple sclerosis; NMOSD, neuromyelitis optica spectrum disorder; MLR, monocyte-to-lymphocyte ratio; NLR, neutrophil-to-lymphocyte ratio; PLR, platelet-to-lymphocyte ratio; SII, systemic immune-inflammatory index; SIRI, systemic inflammatory response index.

**Supplementary Table 6** Diagnostic Efficacy of Inflammatory and Nutritional Markers for MS and NMOSD

| **Indicator** | **Area under the curve ( Asymptotically Approaching 95%**  **Confidence Interval )** | | |
| --- | --- | --- | --- |
|
| **MS vs HC** | **NMOSD vs HC** | **MS vs NMOSD** |
| MLR | 0.638(0.589–0.686) | 0.708(0.662–0.754) | 0.577(0.527–0.628) |
| NLR | 0.606(0.557–0.656) | 0.687(0.640–0.734) | 0.576(0.525–0.627) |
| PLR | 0.560(0.509–0.610) | - | - |
| SII | 0.564(0.514–0.615) | 0.654(0.605–0.703) | 0.578(0.528–0.629) |
| SIRI | 0.678(0.631–0.725) | 0.748(0.704–0.792) | 0.586(0.535–0.636) |
| Inflammatory markers | 0.73(0.687–0.774) | 0.779(0.738–0.820) | 0.546(0.495–0.597) |
| HB | - | 0.638(0.589–0.686) | 0.593(0.543–0.643) |
| ALB | 0.787(0.746–0.828) | 0.862(0.829–0.896) | 0.638(0.586–0.690) |
| BMI | - | - | 0.563(0.510–0.616) |
| Nutritional markers | 0.787(0.746–0.828) | 0.863(0.83–0.896) | 0.655(0.604–0.705) |
| Inflammatory and nutritional markers | 0.836(0.801–0.871) | 0.91(0.884–0.936) | 0.673(0.623–0.722) |
| Predictive model | 0.840(0.806-0.875) | 0.905(0.877-0.933) | 0.806(0.750-0.863) |

ALB, albumin; BMI, body mass index; HB, hemoglobin; HC, healthy control; MLR, monocyte-to-lymphocyte ratio; MS, multiple sclerosis; NLR, neutrophil-to-lymphocyte ratio; NMOSD, neuromyelitis optica spectrum disorder; PLR, platelet-to-lymphocyte ratio; SII, systemic immune-inflammatory index; SIRI, systemic inflammatory response index.
